# Supplementary material for: Granular aqueous suspensions with controlled interparticular friction and adhesion
Source: Royal Society of Chemistry journal article supplement (doi:10.1039/d4sm00381k), 2024-01-01
Supplement: d4sm00381k1.pdf [file d4sm00381k1.pdf]

## Supporting information

### Title: Granular aqueous suspensions with controlled inter-particle friction and adhesion

Lily Blaiset,<sup>a,b</sup> Bruno Bresson,<sup>b</sup> Ludovic Olanier,<sup>b</sup> Elisabeth Guazzelli,<sup>a</sup> Matthieu Roché,<sup>a</sup> and Nicolas Sanson<sup>b</sup>

<sup>a</sup>Université Paris Cité, CNRS, Matières et Systèmes Complexes UMR 7057, F-75013, Paris, France.

<sup>b</sup>Laboratoire SIMM, ESPCI Paris, PSL University, CNRS, Sorbonne Université, 75231 Cédex 05 Paris, France.

Figure S1 :

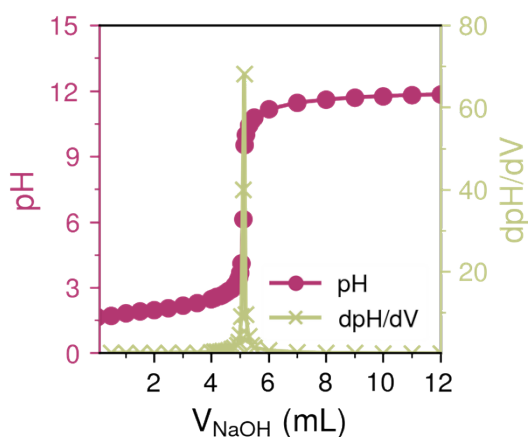

Figure S 1: Carboxylate content ( $-\text{CH}_3\text{COO}^-$ , MAA) of 62 wt% determined by indirect titration.

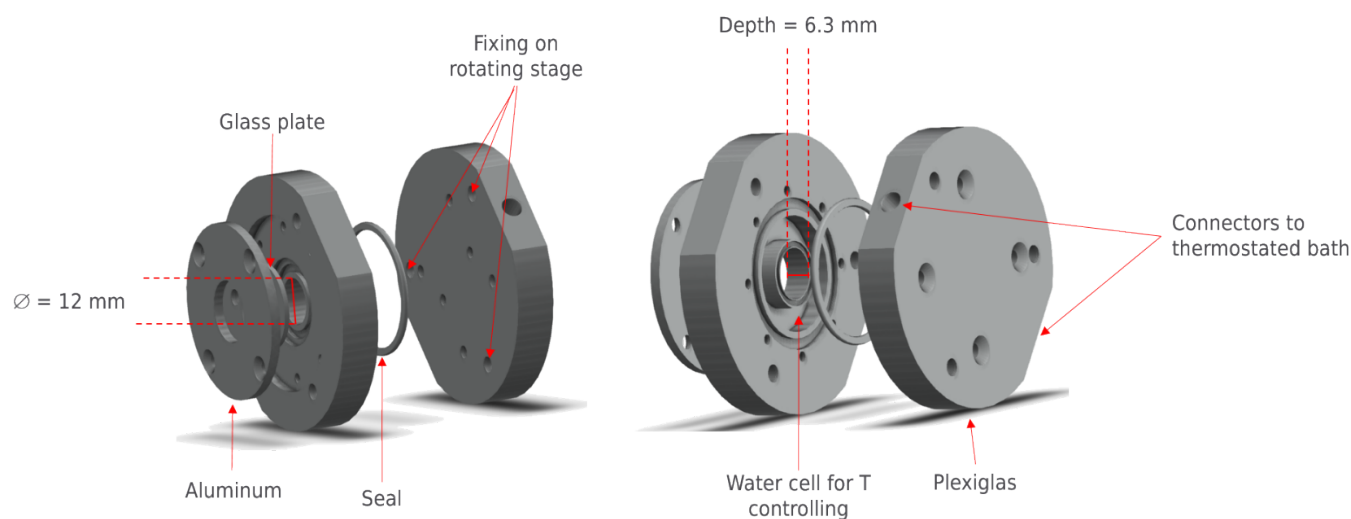

Figure S 2: Schematic of the thermostatically controlled drum used for temperature-varying experiments. The drum is connected to a thermostated bath and a peristaltic pump to control the temperature and water flow around the drum cell.

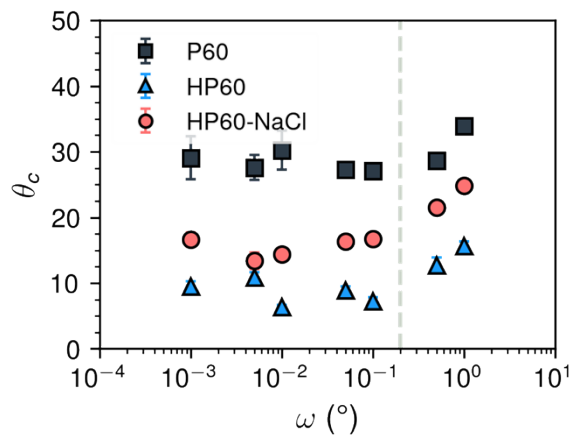

Figure S 3: Avalanche angle ( $\theta_c$ ) as a function of rotation speed ( $\omega$ ) for poly(methyl methacrylate) (PMMA) particles (P60) in pure water and hydrolyzed poly(sodium methacrylate) (PMAA-Na) particles (HP60) in pure water and in presence of NaCl ( $I = 0.5$  M). For  $\omega \leq 0.2$   $^\circ$ :s $^{-1}$ , the avalanche angle ( $\theta_c$ ) is independent of  $\omega$ , i.e. measurements are performed in a quasi static regime.

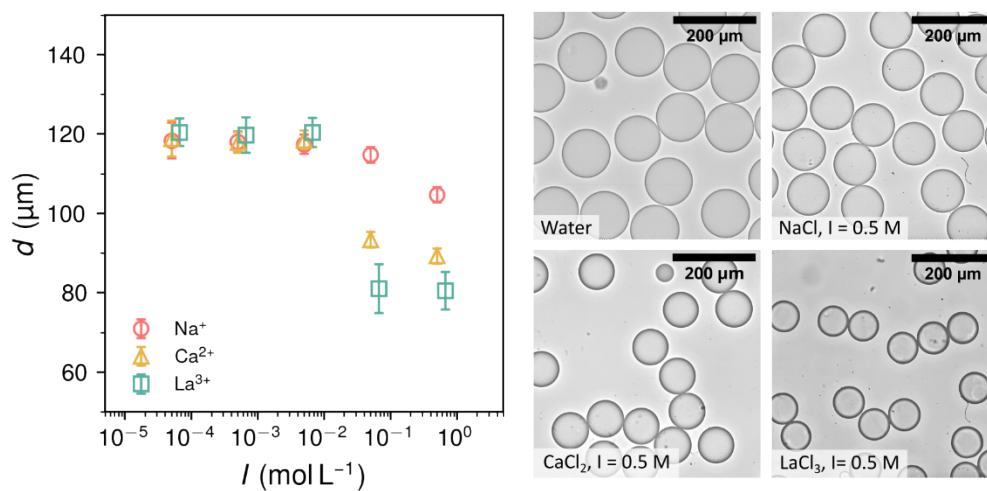

Figure S 4: Swelling behavior of hydrolyzed particles (HP60) in the presence of NaCl,  $\text{CaCl}_2$ , and  $\text{LaCl}_3$ . (Left) Particle diameter ( $d$ ) as a function of ionic strength ( $I$ ). (Right) Microscopy images of HP60 particle suspensions in water, and in the presence of NaCl,  $\text{CaCl}_2$ , and  $\text{LaCl}_3$  at  $I = 0.5$  M.

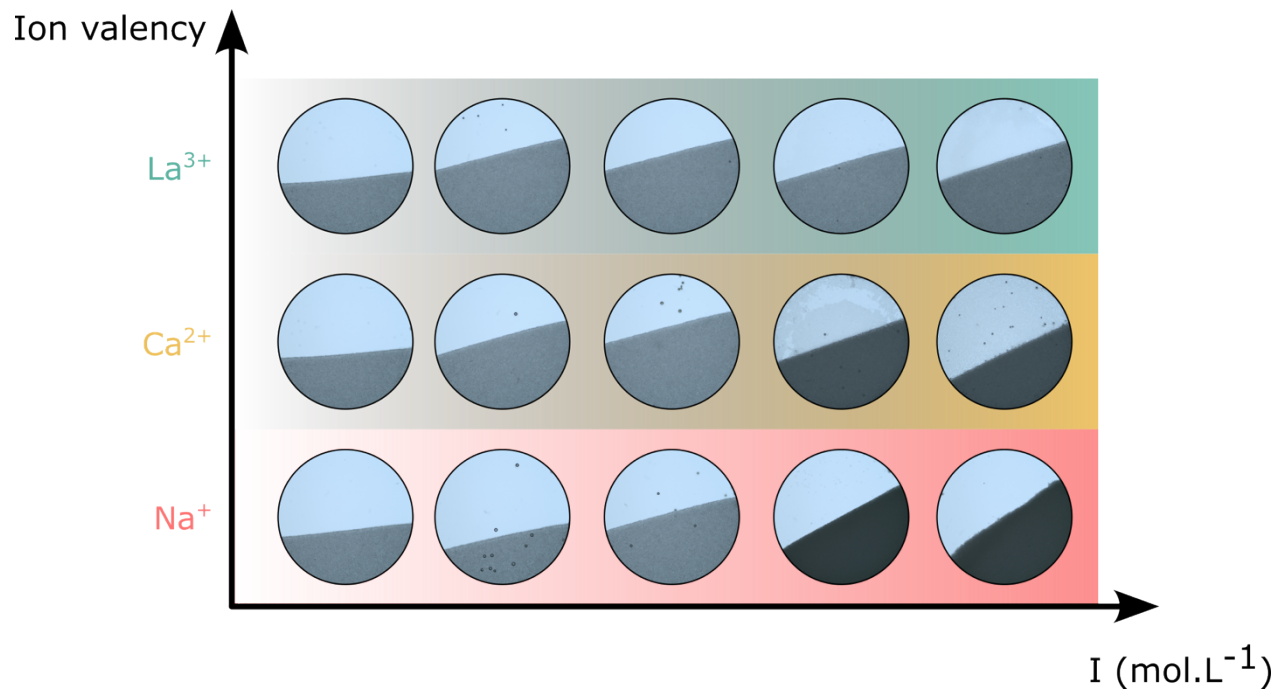

Figure S 5: Rotating drum images of HP60 particles in presence of mono- ( $\text{Na}^+$ ) and multivalent cations ( $\text{Ca}^{2+}$ ,  $\text{La}^{3+}$ ) with increasing ionic strength from 0 to 0.5 mol.L<sup>-1</sup>. The avalanche angles displayed in Figure 4 in the paper were determined from a serie of 20 to 30 images for each data point.
